# Supplementary material for: Small Molecule Inhibition of an Exopolysaccharide Modification Enzyme is a Viable Strategy To Block Pseudomonas aeruginosa Pel Biofilm Formation
Source: PubMed Central journal article supplement (PMC10269871; doi:10.1128/spectrum.00296-23), 2023-04-26

**Supplementary Table 1: Bacterial strains used in this study.**

| Strains                                                                    | Genotype or relevant characteristics <sup>1</sup>                                                                                                                                                                                                                                                         | Source               |
|----------------------------------------------------------------------------|-----------------------------------------------------------------------------------------------------------------------------------------------------------------------------------------------------------------------------------------------------------------------------------------------------------|----------------------|
| <i>Pseudomonas aeruginosa</i>                                              |                                                                                                                                                                                                                                                                                                           |                      |
| PAO1                                                                       | Wild type strain from Colin Manoil, genome resequenced                                                                                                                                                                                                                                                    | (1)                  |
| PAO1 $\Delta$ <i>wspF</i> $\Delta$ <i>psl</i> P <sub>BAD</sub> <i>pel</i>  | In-frame deletion of <i>wspF</i> , polar deletion of <i>pslBCD</i> , <i>araC</i> -P <sub>BAD</sub> inserted upstream of <i>pelABCDEFG</i>                                                                                                                                                                 | (2)                  |
| JJH885                                                                     | PAO1 $\Delta$ <i>wspF</i> $\Delta$ <i>psl</i> P <sub>BAD</sub> <i>pel</i> $\Delta$ <i>pelF</i>                                                                                                                                                                                                            | (3)                  |
| JJH879                                                                     | PAO1 $\Delta$ <i>wspF</i> $\Delta$ <i>psl</i> P <sub>BAD</sub> <i>pel</i> $\Delta$ <i>pelA</i>                                                                                                                                                                                                            | (4)                  |
| JDR82                                                                      | Gen <sup>r</sup> , JJH879 <i>attTn7::miniTn7T-Gm</i>                                                                                                                                                                                                                                                      | (4)                  |
| LSM30                                                                      | Gen <sup>r</sup> , JJH879 <i>attTn7::miniTn7T2.1-Gm-GW::araC-P<sub>BAD</sub>::pelA</i>                                                                                                                                                                                                                    | (5)                  |
| JDR47                                                                      | Gen <sup>r</sup> , JJH879 <i>attTn7::miniTn7T2.1-Gm-GW::araC-P<sub>BAD</sub>::pelA<sup>D528A</sup></i>                                                                                                                                                                                                    | This study           |
| PAO1 $\Delta$ <i>pelF</i> P <sub>BAD</sub> <i>psl</i>                      | In-frame deletion of <i>pelF</i> , <i>araC</i> -P <sub>BAD</sub> inserted upstream of <i>pslA</i>                                                                                                                                                                                                         | (6)                  |
| PAO1 $\Delta$ <i>wspF</i> $\Delta$ <i>pelF</i> P <sub>BAD</sub> <i>psl</i> | In-frame deletion of <i>wspF</i> and <i>pelF</i> , <i>araC</i> -P <sub>BAD</sub> inserted upstream of <i>pslA</i>                                                                                                                                                                                         | This study           |
| PA14                                                                       | Wild type strain                                                                                                                                                                                                                                                                                          | (2)                  |
| PA14 $\Delta$ <i>wspF</i>                                                  | <i>wspF</i> , nonpolar mutation                                                                                                                                                                                                                                                                           | (7)                  |
| <i>Bacillus cereus</i>                                                     |                                                                                                                                                                                                                                                                                                           |                      |
| ATCC 10987                                                                 | Wild type strain                                                                                                                                                                                                                                                                                          | A.J. Clarke          |
| <i>Escherichia coli</i>                                                    |                                                                                                                                                                                                                                                                                                           |                      |
| TOP10                                                                      | Str <sup>R</sup> , F <sup>-</sup> <i>mcrA</i> $\Delta$ ( <i>mrr-hsdRMS-mcrBC</i> ) $\Phi$ 80 <i>lacZ</i> $\Delta$ M15 $\Delta$ <i>lacX74</i> <i>recA1</i> <i>araD139</i> $\Delta$ ( <i>ara leu</i> ) 7697 <i>galU</i> <i>galK</i> <i>rpsL</i> <i>endA1</i> <i>nupG</i>                                    | Invitrogen           |
| BL21CodonPlus (DE3)-RP                                                     | Kan <sup>R</sup> , F <sup>-</sup> <i>ompT</i> <i>hsdS</i> (rB <sup>-</sup> mB <sup>-</sup> ) <i>dcm</i> <sup>+</sup> Tet <sup>r</sup> <i>gal</i> $\lambda$ (DE3) <i>endA</i> Hte <i>metaA::Tn5</i> (Kan <sup>r</sup> ) [ <i>argU</i> <i>ileY</i> <i>leuW</i> Cam <sup>r</sup> ]                           | Stratagene           |
| SM10 ( $\lambda$ <sub>pir</sub> )                                          | Kan <sup>R</sup> , Tet <sup>R</sup> . <i>thi</i> <i>thr</i> <i>leu</i> <i>tonA</i> <i>lacY</i> <i>supE</i> <i>recA::RP4-2-Tc::MuK<sub>m</sub></i> $\lambda$ <sub>pir</sub>                                                                                                                                | (8)                  |
| XL10-Gold                                                                  | Tet <sup>R</sup> , $\Delta$ ( <i>mcrA</i> )183 $\Delta$ ( <i>mcrCB-hsdSMR-mrr</i> )173 <i>endA1</i> <i>supE44</i> <i>thi-1</i> <i>recA1</i> <i>gyrA96</i> <i>relA1</i> <i>lac</i> Hte [F <sup>+</sup> <i>proAB</i> <i>lacI<sup>s</sup></i> Z $\Delta$ M15 Tn10 (Tet <sup>R</sup> ) Amy Cam <sup>R</sup> ] | Agilent Technologies |

<sup>1</sup>Abbreviations for antibiotic selection: Gen, gentamicin; Str, streptomycin; Tet, tetracycline; Cam, chloramphenicol; Kan, kanamycin.

**Supplementary Table 2: Plasmids used in this study.**

| <b>Plasmids</b>                 | <b>Genotype or relevant characteristics<sup>1</sup></b>                                                                                                   | <b>Source</b> |
|---------------------------------|-----------------------------------------------------------------------------------------------------------------------------------------------------------|---------------|
| <b>Protein production</b>       |                                                                                                                                                           |               |
| pET-24a(+)                      | Kan <sup>R</sup> , IPTG-inducible expression vector                                                                                                       | Novagen       |
| pER-PeIA <sup>47-948</sup>      | PeIA encoding the full-length protein excluding the predicted signal sequence. Expressed in pET-24a                                                       | This study    |
| pNA <i>peIA</i> <sup>Δ46</sup>  | pET28a based <i>peIA</i> expression vector                                                                                                                | (9)           |
| <b>Complementation analysis</b> |                                                                                                                                                           |               |
| pUC18-miniTn7T2.1-Gm-GW         | Amp <sup>R</sup> , Gen <sup>R</sup> , Cam <sup>R</sup> , miniTn7 with transcriptional terminators flanking the Tn7 transposon; Gateway destination vector | (10)          |
| pTNS2                           | Amp <sup>R</sup> , helper plasmid encoding <i>tnsABCD</i>                                                                                                 | (11)          |
| pCAS4                           | Gen <sup>R</sup> , Amp <sup>R</sup> , pUC18-miniTn7T2.1-Gm-GW with <i>araC-P<sub>BAD</sub>::peIA</i> in the Gateway cloning site                          | (5)           |
| pJDR45                          | Gen <sup>R</sup> , Amp <sup>R</sup> , pCAS4 with <i>P<sub>BAD</sub>::peIA<sup>D528A</sup></i>                                                             | This study    |
| <b>Allelic exchange vectors</b> |                                                                                                                                                           |               |
| pEX18Gm                         | Gen <sup>R</sup> , suicide vector for allelic exchange in <i>P. aeruginosa</i> , SacB, lacZα                                                              | (8)           |
| pEX18Gm::Δ <i>wspF</i>          | Gen <sup>R</sup> , in-frame <i>wspF</i> deletion construct                                                                                                | (12)          |

<sup>1</sup>Abbreviations for antibiotic selection: Amp, ampicillin; Cam, chloramphenicol; Kan, kanamycin; Gen, gentamicin.

**Supplementary Table 3: Primers used in this study.**

| <b>Primer name or identifier</b>                  | <b>Sequence<sup>1</sup></b>                                      |
|---------------------------------------------------|------------------------------------------------------------------|
| <b>Vectors for recombinant protein production</b> |                                                                  |
| oER5_PelA47ChisF-NdeI                             | GGG <b>CAT ATG</b> <u>GGC GGG CCG TCC AGC GTG GCG</u>            |
| oER6_PelA948ChisR-XhoI                            | GGG <b>CTC GAG</b> <u>GCG GCA GAC GAG TTG GCC ATC GCG</u>        |
| <b>Sequencing primers</b>                         |                                                                  |
| GW7_wspFupF                                       | CGT <b>GAA TTC</b> <u>TGA ACG TCC TGC TGG TGC CGGA</u>           |
| GW10_wspFdownR                                    | TCT <b>AAG CTT</b> <u>CTT CCT TGG TCG ACA GGA CGA T</u>          |
| oER7_PelA47_int1                                  | <u>GCG GTG GCC GTG GAG TCG ATC</u>                               |
| oER8_PelA47_int2                                  | <u>CTC GAC GAA AAG GTG CCG GTG</u>                               |
| oER9_PelA47_int3                                  | <u>CAG GTG CTG GAG GAC TTC ATC</u>                               |
| oER10_PelA47_int4                                 | <u>CAG TAC TAC GCG CCG ATC ATC</u>                               |
| oJDR33_araC-ParaBAD-500F01-SEQ                    | <u>GGT GCG CTT CAT CCG GGC G</u>                                 |
| oJDR34_araC-ParaBAD-1000F01-SEQ                   | <u>GCA TTC TGT AAC AAA GCG G</u>                                 |
| oJDR35_PelA-308R01-SEQ                            | <u>CGA TGG CGG CGG CGT CG</u>                                    |
| oJDR36_PelA-770R01-SEQ                            | <u>GCG GCA GGT AGT CGA TGG CG</u>                                |
| oJDR37_PelA-1308R01-SEQ                           | <u>GCC GGC AGG TCG CGG ATC CG</u>                                |
| oJDR38_PelA-1808R01-SEQ                           | <u>CTG CCA GAA GAA CGG ATG G</u>                                 |
| oJDR39_PelA-2308R01-SEQ                           | <u>GGT GCA TGG TGC GGA TCG</u>                                   |
| oJDR40_PelA-2808R01-SEQ                           | <u>CAT CGC GCA CCT GCT CCA TC</u>                                |
| oJH371_PTn7R                                      | <u>CAC AGC ATA ACT GGA CTG ATT TC</u>                            |
| oJH372_PTn7L                                      | <u>ATT AGC TTA CGA CGC TAC ACC C</u>                             |
| oJH374_PgImS-up                                   | <u>CTG TGC GAC TGC TGG AGC TGA</u>                               |
| oJH373_PgImS-down                                 | <u>GCA CAT CGG CGA CGT GCT CTC</u>                               |
| <b>Site-directed mutagenesis</b>                  |                                                                  |
| oJDR41_PelA-D528A-F01                             | <u>GCC ACC GTG CAC ATC</u> <i>gcc</i> <u>GGC GAC GGC TTC GTC</u> |
| oJDR42_PelA-D528A-R01                             | <u>GAC GAA GCC GTC GCC</u> <i>ggc</i> <u>GAT GTG CAC GGT GGC</u> |

<sup>1</sup>Restriction and attachment sites are bolded; regions complementary to the target amplicon are underlined; regions of reverse complementarity (to facilitate splicing) are italicized; lowercase letters denote a nucleotide substitution.

## Supplementary Information References:

1. **Harrison JJ, Almblad H, Irie Y, Wolter DJ, Eggleston HC, Randall TE, Kitzman JO, Stackhouse B, Emerson JC, Mcnamara S, Larsen TJ, Shendure J, Hoffman LR, Wozniak DJ, Parsek MR.** 2020. Elevated exopolysaccharide levels in *Pseudomonas aeruginosa* flagellar mutants have implications for biofilm growth and chronic infections. *PLoS Genet* **16**:1–22.
2. **Colvin KM, Alnabeseya N, Baker P, Whitney JC, Howell PL, Parsek MR.** 2013. PelA Deacetylase Activity Is Required for Pel Polysaccharide Synthesis in *Pseudomonas aeruginosa*. *J Bacteriol* **195**:2329–2339.
3. **Whitfield GB, Marmont LS, Ostaszewski A, Rich JD, Whitney JC, Parsek MR, Harrison JJ, Howell PL.** 2020. Pel Polysaccharide Biosynthesis Requires an Inner Membrane Complex Comprised of PelD, PelE, PelF, and PelG. *J Bacteriol* **202**:471–18.
4. **Razvi E, Whitfield GB, Reichhardt C, Dreifus JE, Willis AR, Gluscencova OB, Gloag ES, Awad TS, Rich JD, da Silva DP, Bond W, Le Mauff F, Sheppard DC, Hatton BD, Stoodley P, Reinke AW, Boulianne GL, Wozniak DJ, Harrison JJ, Parsek MR, Howell PL.** 2023. Glycoside hydrolase processing of the Pel polysaccharide alters biofilm biomechanics and *Pseudomonas aeruginosa* virulence. *npj Biofilms Microbiomes* **X**:X–X.
5. **Marmont LS, Whitfield GB, Rich JD, Yip P, Giesbrecht LB, Stremick CA, Whitney JC, Parsek MR, Harrison JJ, Howell PL.** 2017. PelA and PelB form a modification and secretion complex essential for Pel polysaccharide-dependent biofilm formation in *Pseudomonas aeruginosa*. *J Biol Chem* **292**:19411–19422.
6. **Baker P, Whitfield GB, Hill PJ, Little DJ, Pestrak MJ, Robinson H, Wozniak DJ, Howell PL.** 2015. Characterization of the *Pseudomonas aeruginosa* Glycoside Hydrolase PslG Reveals That Its Levels Are Critical for Psl Polysaccharide Biosynthesis and Biofilm Formation\*. *J Biol Chem* **290**:28374–28387.
7. **Jennings LK, Storek KM, Ledvina HE, Coulon C, Marmont LS, Sadovskaya I, Secor PR, Tseng BS, Scian M, Filloux A, Wozniak DJ, Howell PL, Parsek MR.** 2015. Pel is a cationic exopolysaccharide that cross-links extracellular DNA in the *Pseudomonas aeruginosa* biofilm matrix. *Proc Natl Acad Sci USA* **112**:11353–11358.
8. **Hoang TT, Karkhoff-Schweizer RR, Kutchma AJ, Schweizer HP.** 1998. A broad-host-range FLP-FRT recombination system for site-specific excision of chromosomally-located DNA sequences: application for isolation of unmarked *Pseudomonas aeruginosa* mutants. *Gene* **212**:77–86.
9. **Colvin KM, Alnabeseya N, Baker P, Whitney JC, Howell PL, Parsek MR.** 2013. PelA Deacetylase Activity Is Required for Pel Polysaccharide Synthesis in *Pseudomonas aeruginosa*. *J Bacteriol* **195**:2329–2339.
10. **Zhao K, Tseng BS, Beckerman B, Jin F, Gibiansky ML, Harrison JJ, Luijten E, Parsek MR, Wong GCL.** 2013. Psl trails guide exploration and microcolony formation in *Pseudomonas aeruginosa* biofilms. *Nature* **497**:388–392.
11. **Choi K-H, Schweizer HP.** 2006. mini-Tn7 insertion in bacteria with single attTn7 sites: example *Pseudomonas aeruginosa*. *Nat Protoc* **1**:153–161.
12. **Limoli DH, Whitfield GB, Kitao T, Ivey ML, Davis MR Jr, Grahl N, Hogan DA, Rahme LG, Howell PL, O'Toole GA, Goldberg JB.** 2017. *Pseudomonas aeruginosa* Alginate Overproduction Promotes Coexistence with *Staphylococcus aureus* in a Model of Cystic Fibrosis Respiratory Infection. *mBio* **8**:1–18.

**a**0.3  $\mu\text{M}$  PelA $\Delta 46_{\text{NHis6}}$ , 100  $\mu\text{M}$  ACC, & 2% (v/v) DMSO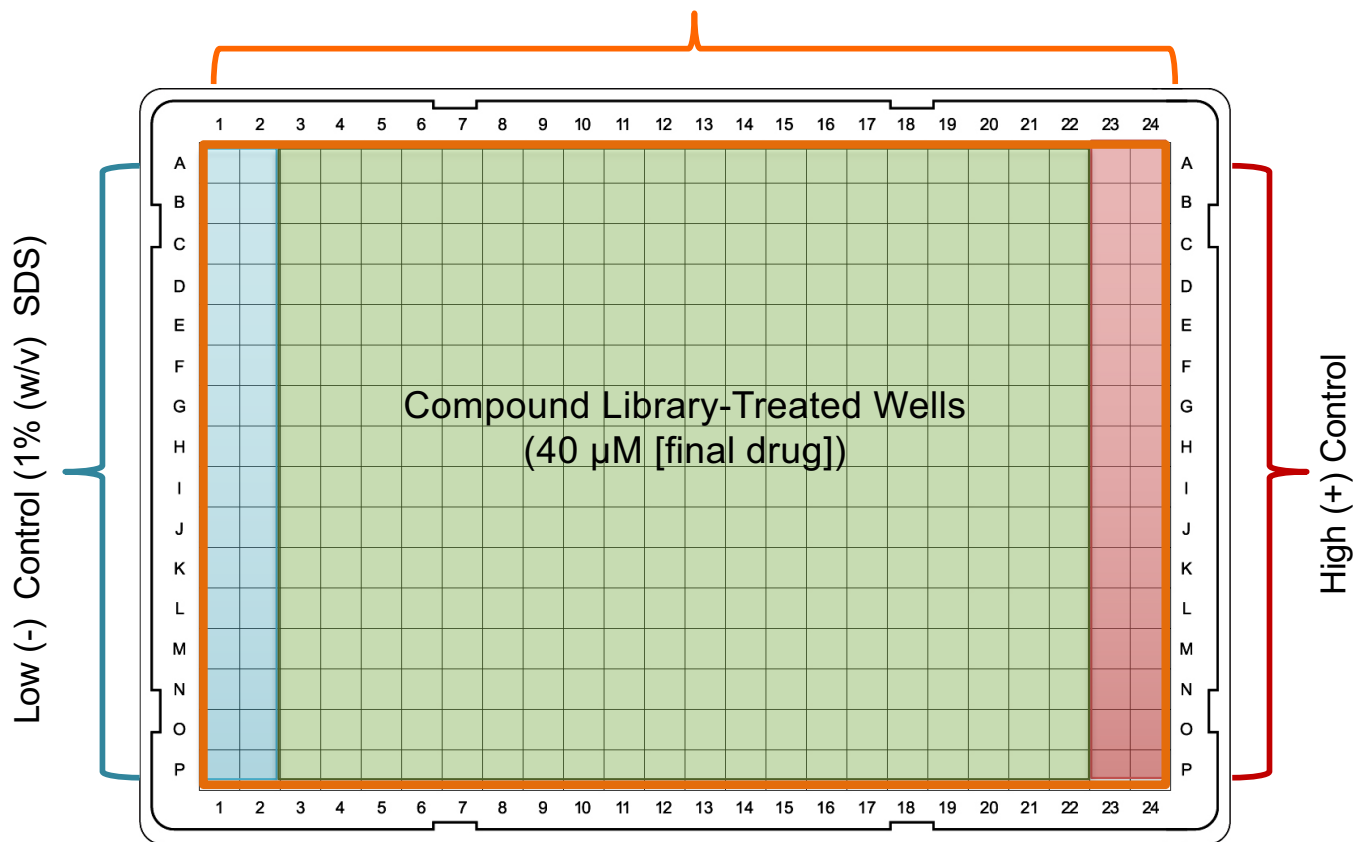**b**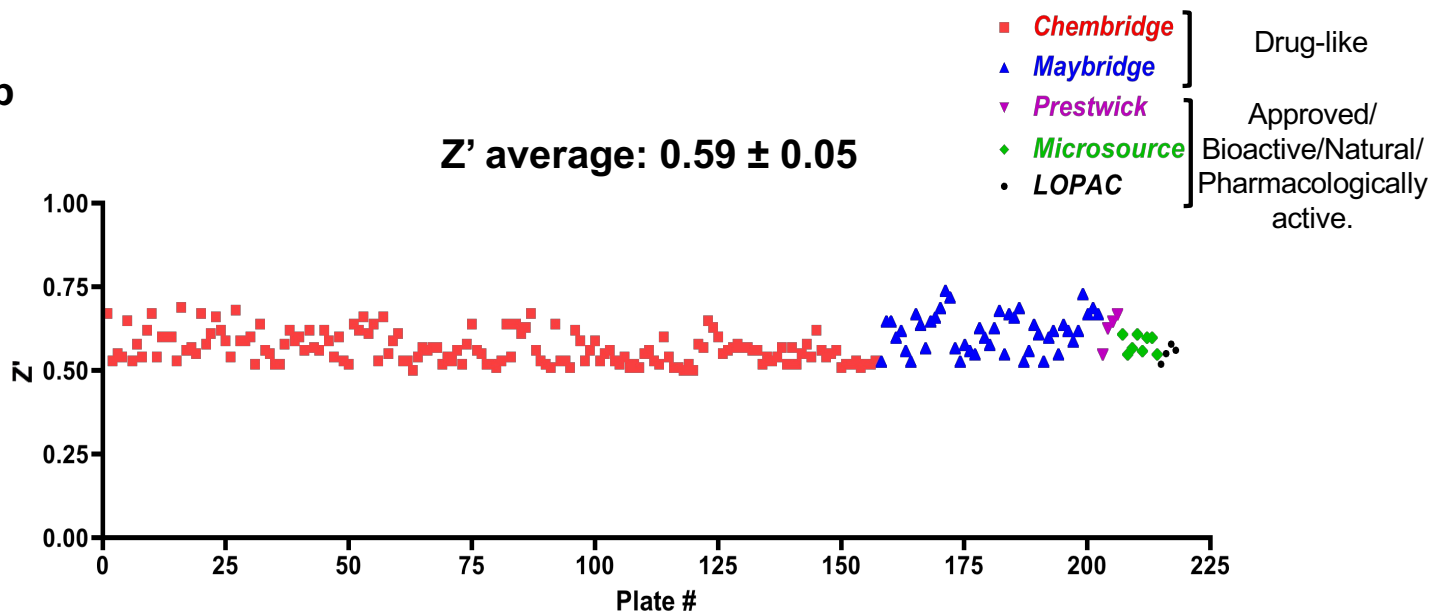

**Supplementary Figure 1: High-throughput screen assay setup and quality.** (A) Schematic of 384-well assay plate set up. (B) Calculated Z' score categorized by chemical library across 217 plates used for screen. ACC, 7-acetoxycoumarin-3-carboxylic acid; DMSO, dimethyl sulfoxide; SDS, sodium dodecyl sulfate.

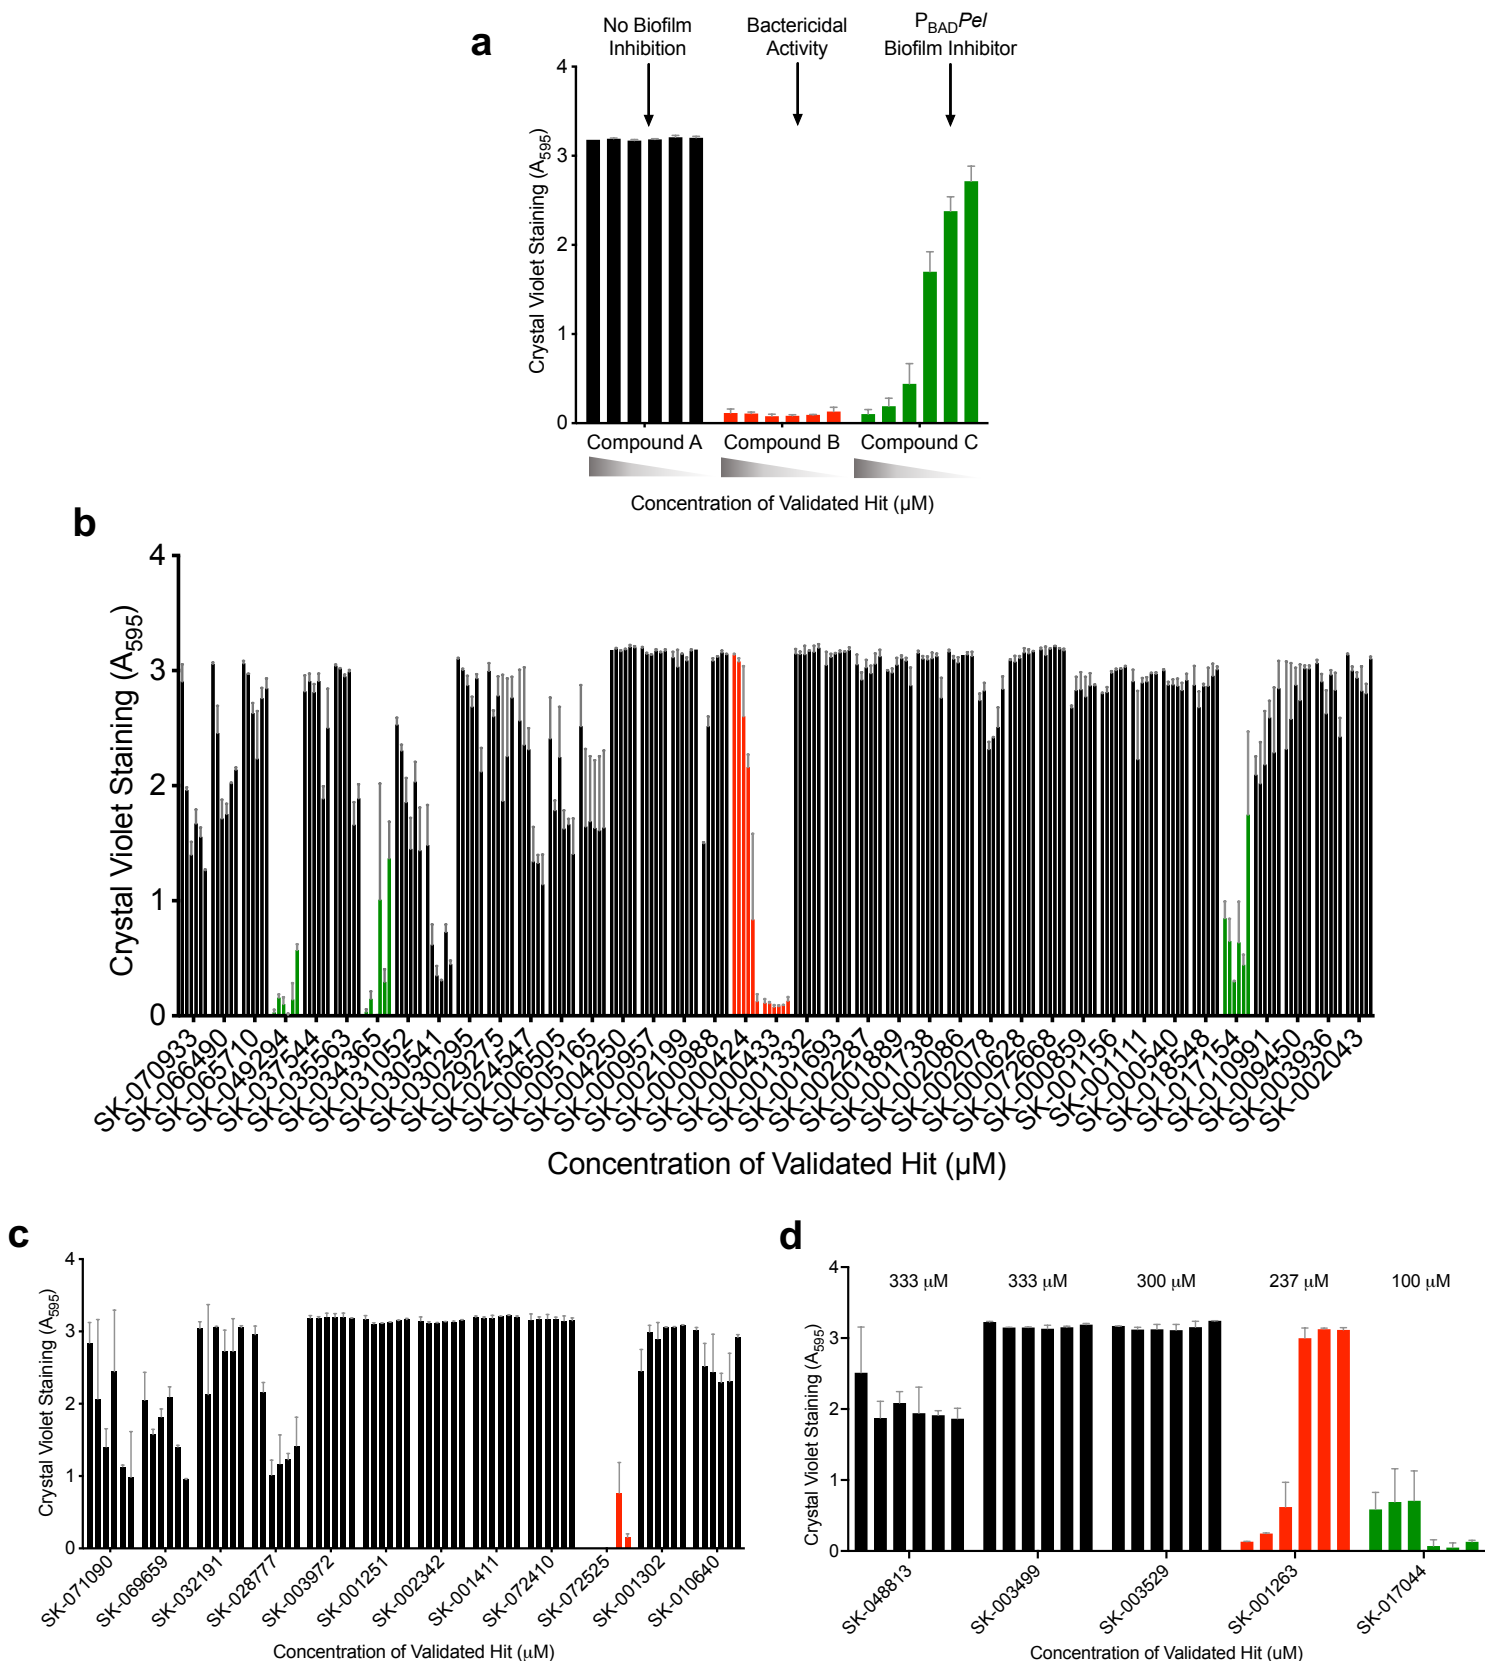

**Supplementary Figure 2: Identification of four validated hit compounds able to inhibit  $P_{BAD}^{pel}$  biofilms** (A) Classification of validated hits subjected to secondary crystal violet assay. Black bars indicate no biofilm inhibition, red bars bactericidal activity, and green bars  $P_{BAD}^{pel}$  biofilm inhibitors. Secondary screening results of validated hits starting at a final concentration of (B) 1000  $\mu\text{M}$  (C) 500  $\mu\text{M}$ . (D) 333  $\mu\text{M}$ , 300  $\mu\text{M}$ , 237  $\mu\text{M}$ , and 100  $\mu\text{M}$  indicated above respective data. All validated hits were added to generate 6 point 2-fold serial dilutions starting at the indicated initial final concentration. Error bars represent standard error of the mean of two independent trials.  $P_{BAD}^{pel}$ , PAO1  $\Delta wspF \Delta psi P_{BAD}^{pel}$ .

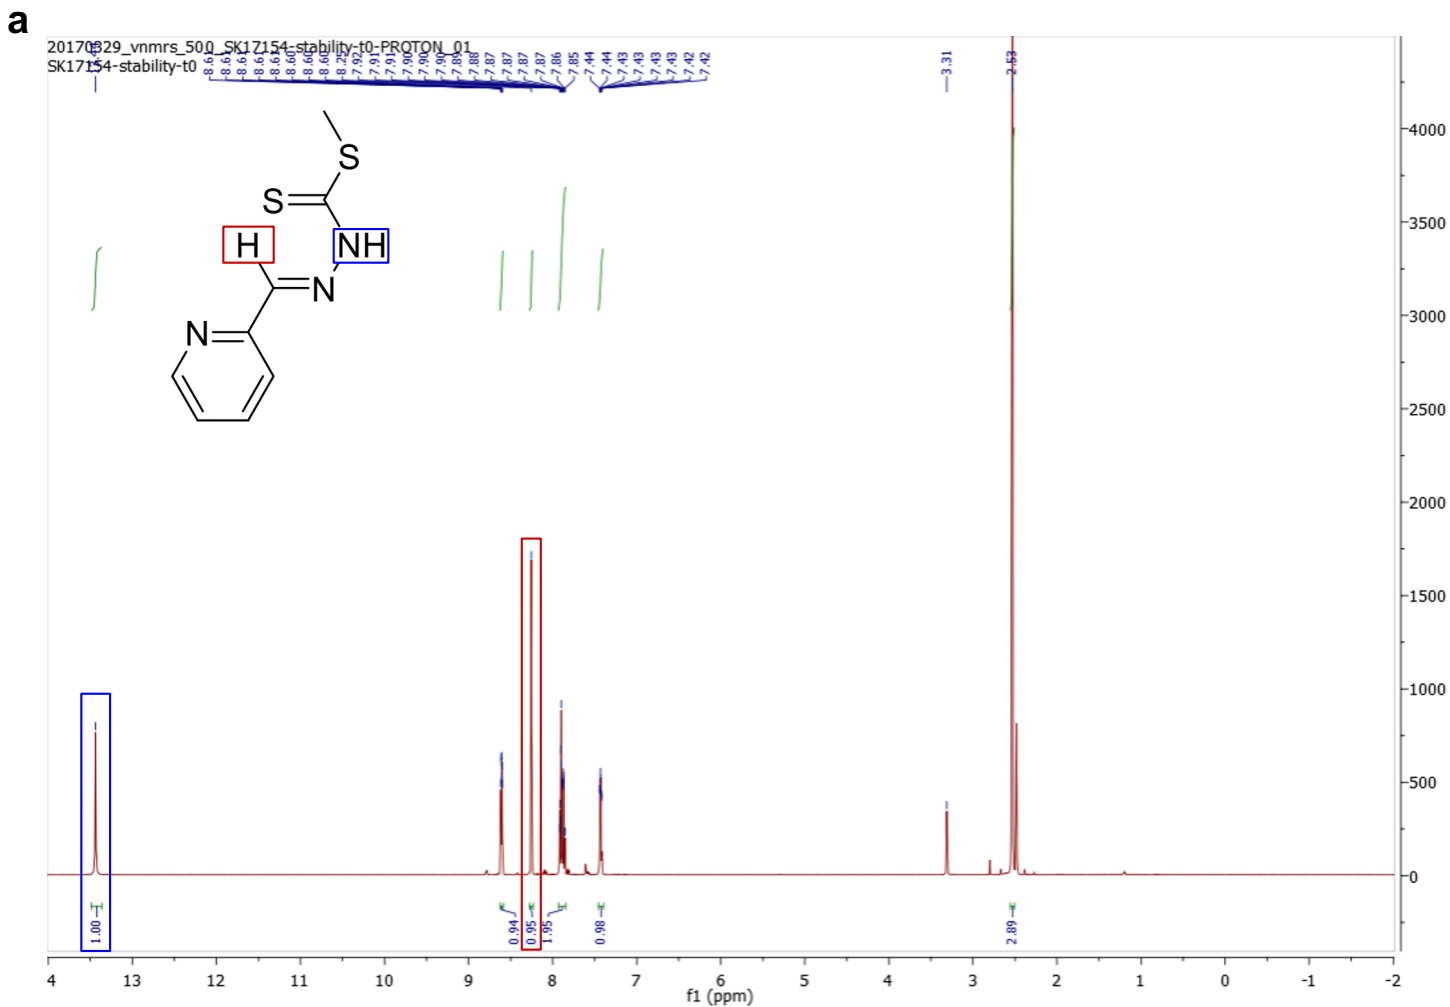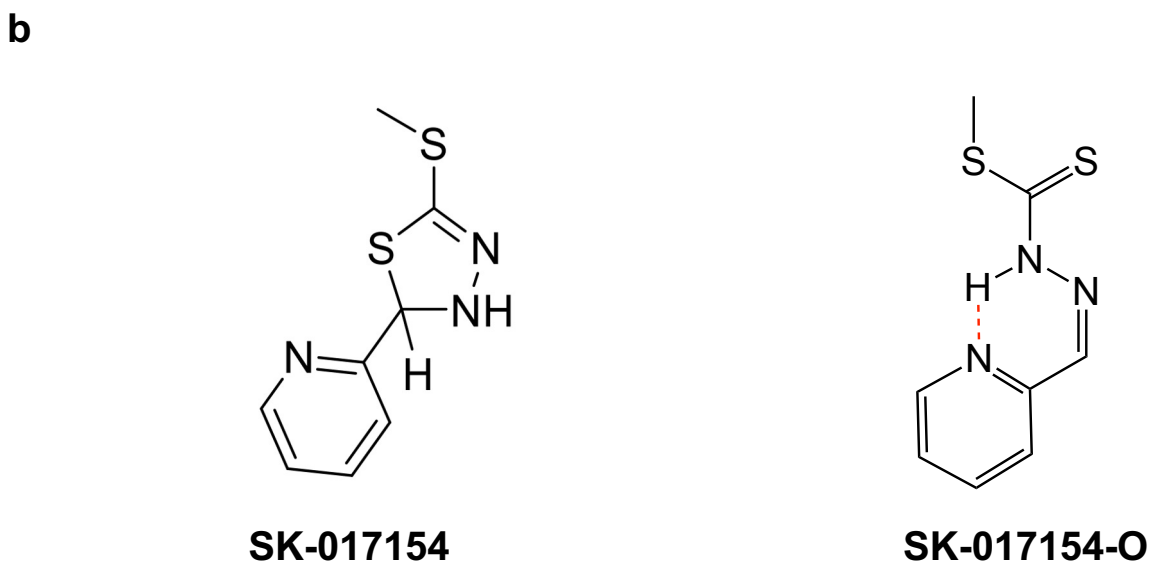

**Supplementary Figure 3: Stable precursor of SK-017154, SK-017154-O, inhibits PA14 biofilm formation.** (A)  $^1\text{H}$  NMR spectra of material purchased from the supplier which was labelled as SK-017154. (B) Structure provided by the supplier for SK-01754 and the structure of 2-pyridinecarboxaldehyde Schiff base of S-methyldithiocarbazate (SK-01754-O) illustrating the hydrogen bond between the pyridyl nitrogen and the N-H.

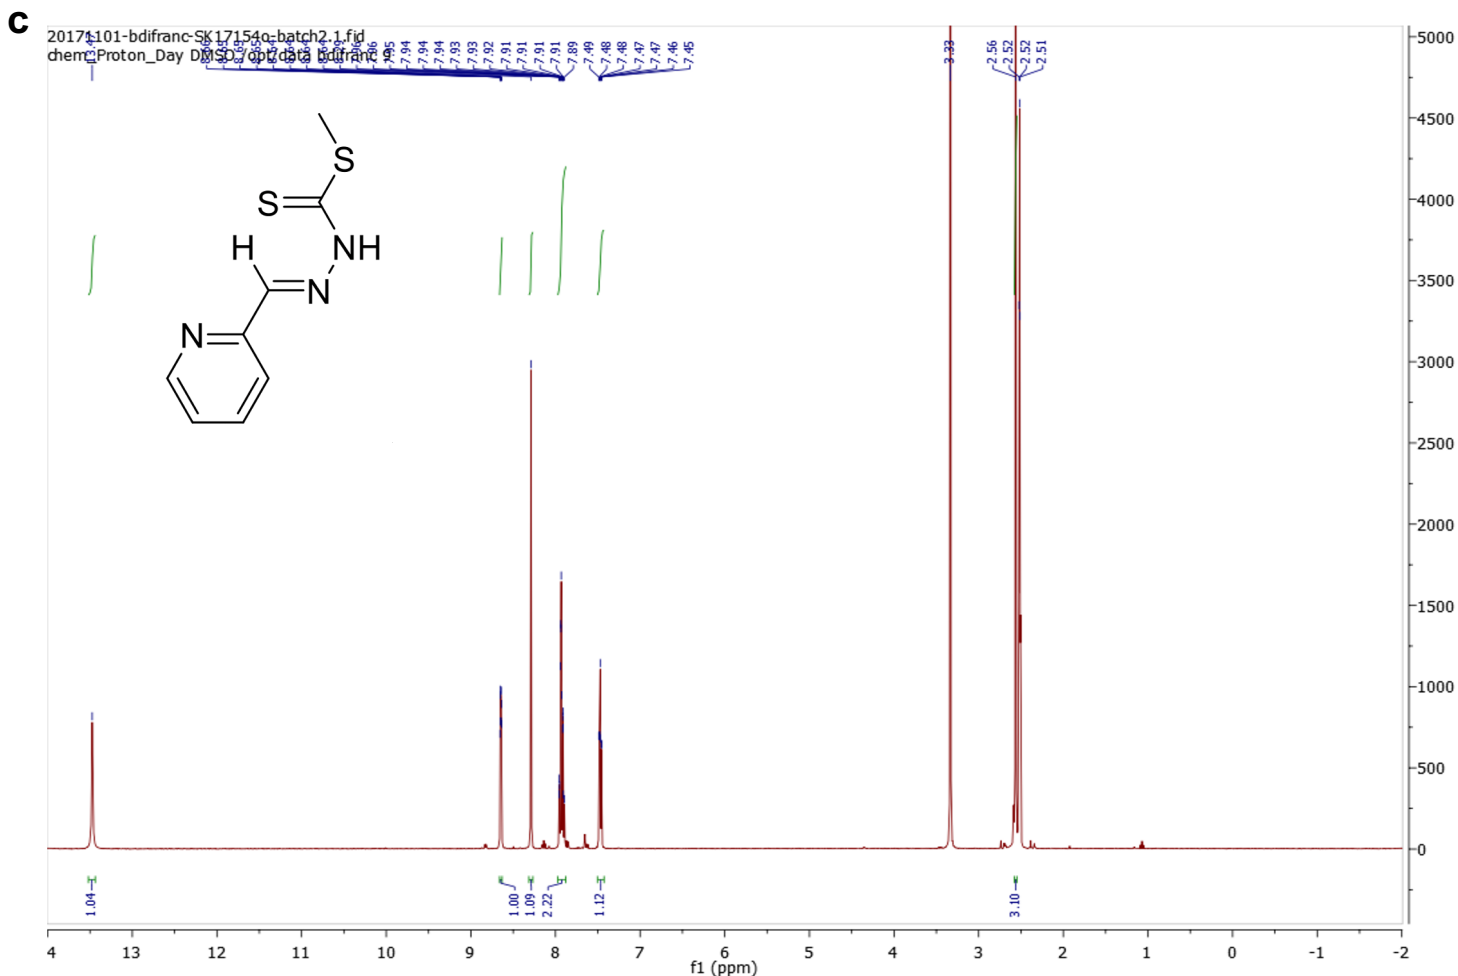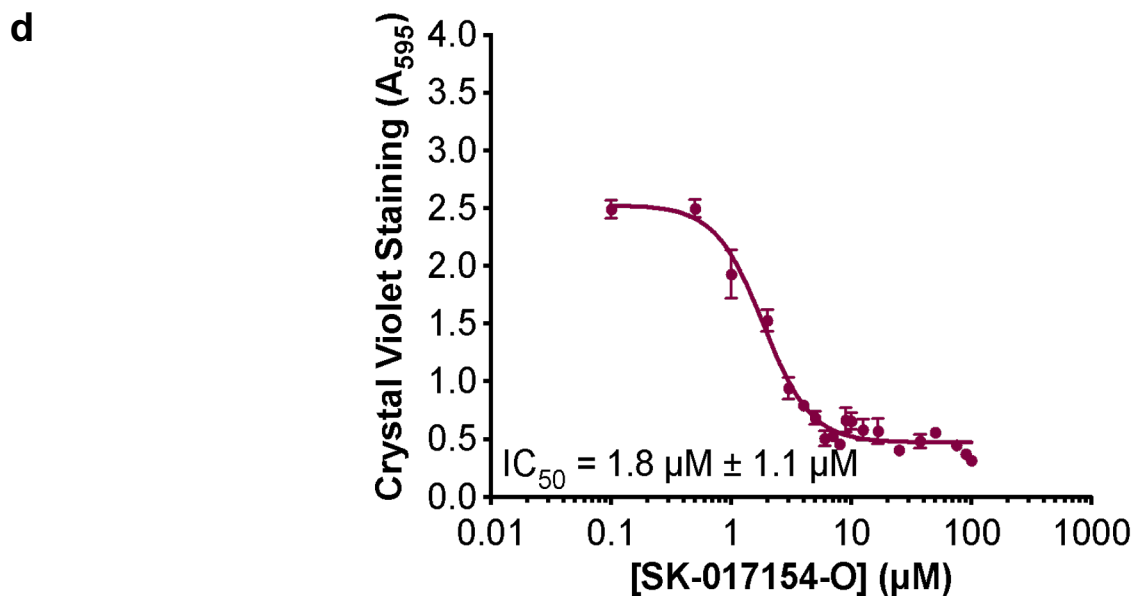

**Supplementary Figure 3 (continued): Stable precursor of SK-017154, SK-017154-O, inhibits PA14 biofilm formation.** (C)  $^1\text{H}$  NMR spectra of synthesized SK-017154-O. (D) Secondary *ex vivo* crystal violet assay results to PA14 using SK-017154-O. Error bars represent standard error of the mean of six independent trials.



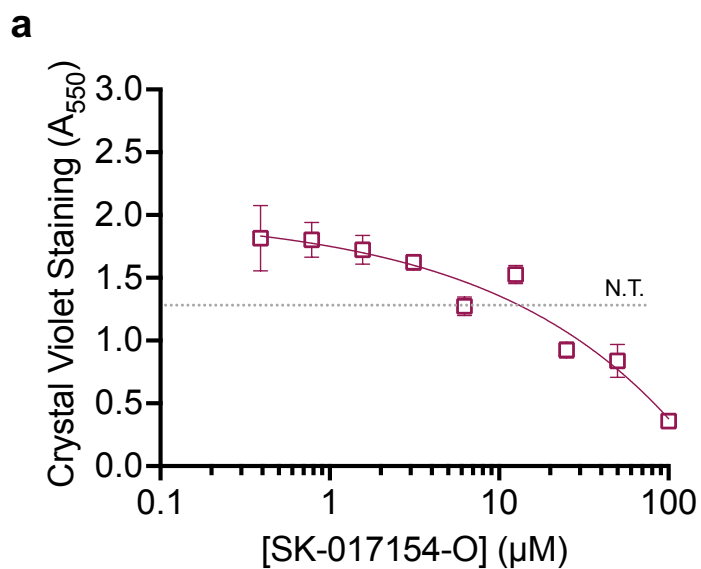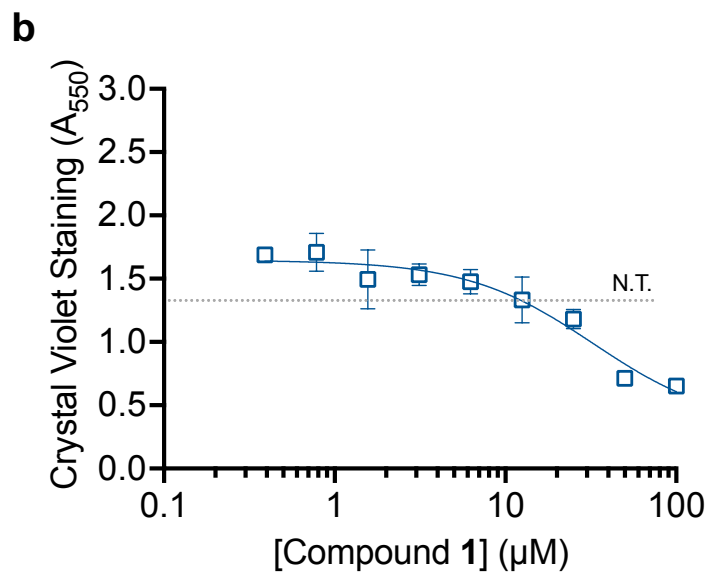

**Supplementary Figure 4: SK-017154-O and Compound 1 can inhibit *B. cereus* Pel dependent biofilms.** Secondary *in vitro* biofilm inhibition assay using (A) SK-017154-O and (B) Compound 1. Error bars represent standard error of the mean of three independent trials. N.T., average  $A_{550}$  of untreated control wells.

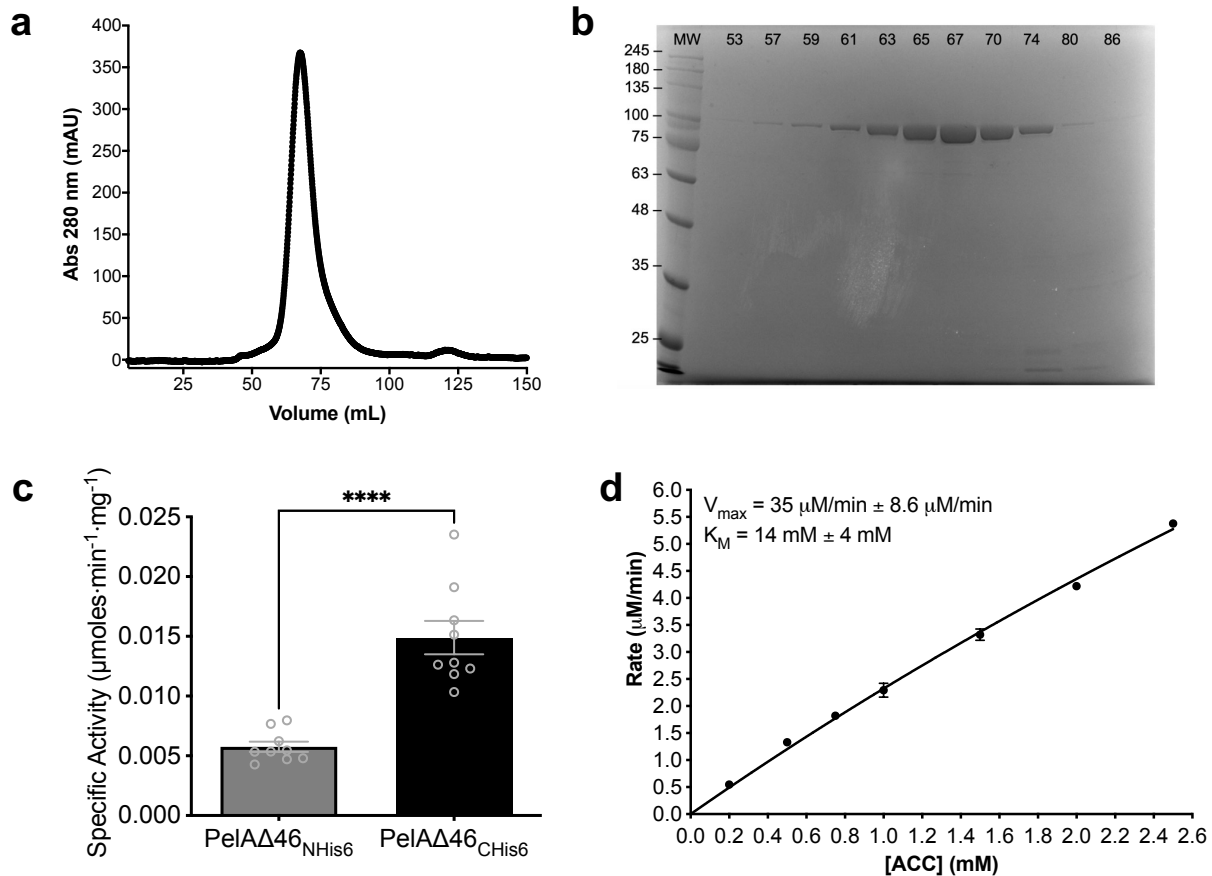

**Supplementary Figure 5: PelA $\Delta$ 46<sub>Chis6</sub> is less degradative and more active in ACC assay than PelA $\Delta$ 46<sub>NHis6</sub>** (A) Gel filtration trace of PelA $\Delta$ 46<sub>Chis6</sub>. (B) Coomassie-stained SDS-PAGE corresponding to the individual peak. Elution fractions are indicated at the top. The molecular weight of PelA $\Delta$ 46<sub>Chis6</sub> is 101.1 kDa. (C) Specific activity of PelA $\Delta$ 46<sub>NHis6</sub> or PelA $\Delta$ 46<sub>Chis6</sub> hydrolysis of ACC. Error bars represent standard error of the mean of nine independent trials. Statistical significance was evaluated using an unpaired T-test with equal standard deviation. \*\*\*\*,  $P < 0.0001$ . (D) PelA $\Delta$ 46<sub>Chis6</sub> enzymology using ACC as substrate. Steady-state kinetics using 0.2 mM to 2.5 mM ACC and 2  $\mu\text{M}$  PelA $\Delta$ 46<sub>Chis6</sub>. Error bars represent standard error of the mean of three independent trials. MW, molecular weight marker in kDa; ACC, 7-acetoxycoumarin-3-carboxylic acid.

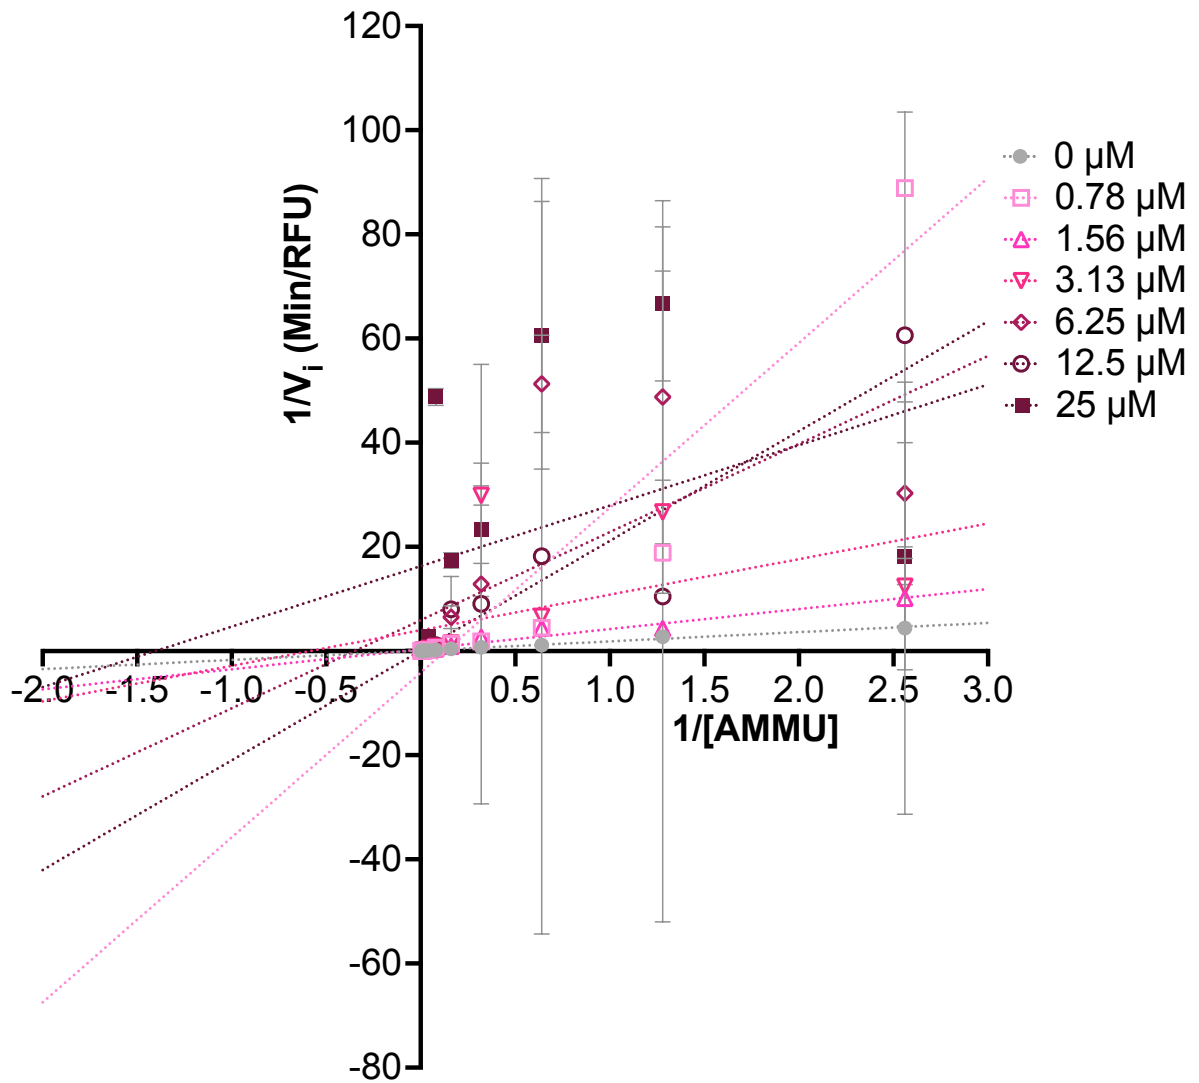

**Supplementary Figure 6: Lineweaver-Burk plot of SK-017154-O inhibition kinetics in Fig. 8B**  
 Error bars represent the standard deviation of two independent trials. RFU, residual fluorescence units; AMMU, acetoxymethyl-4-umbelliferone.

**Supplementary Figure 7: NMR analyses of synthesized compounds. 2-**

pyridinecarboxaldehyde S-methyldithiocarbazate (SK17154-O) (A)  $^1\text{H}$  NMR. (B)  $^{13}\text{C}$  NMR. Benzaldehyde S-methyldithiocarbazate (1) (C)  $^1\text{H}$  NMR. (D)  $^{13}\text{C}$  NMR. Benzaldehyde S-ethylthiocarbazate (9) (E)  $^1\text{H}$  NMR. (F)  $^{13}\text{C}$  NMR. Benzaldehyde S-benzylthiocarbazate (10) (G)  $^1\text{H}$  NMR. (H)  $^{13}\text{C}$ . Benzaldehyde methylthiocarbazate (11) (I)  $^1\text{H}$  NMR. (J)  $^{13}\text{C}$ . Methyl 2-phenylethyl carbamodithioate (12) (K)  $^1\text{H}$  NMR. (L)

# a 2-pyridinecarboxaldehyde S-methyldithiocarbazate (SK17154-O) <sup>1</sup>H NMR

20171101-bdfranc-SK17154o-batch2.1.fid  
chem\_Proton\_Day DMSO /opt/data bdfranc 9

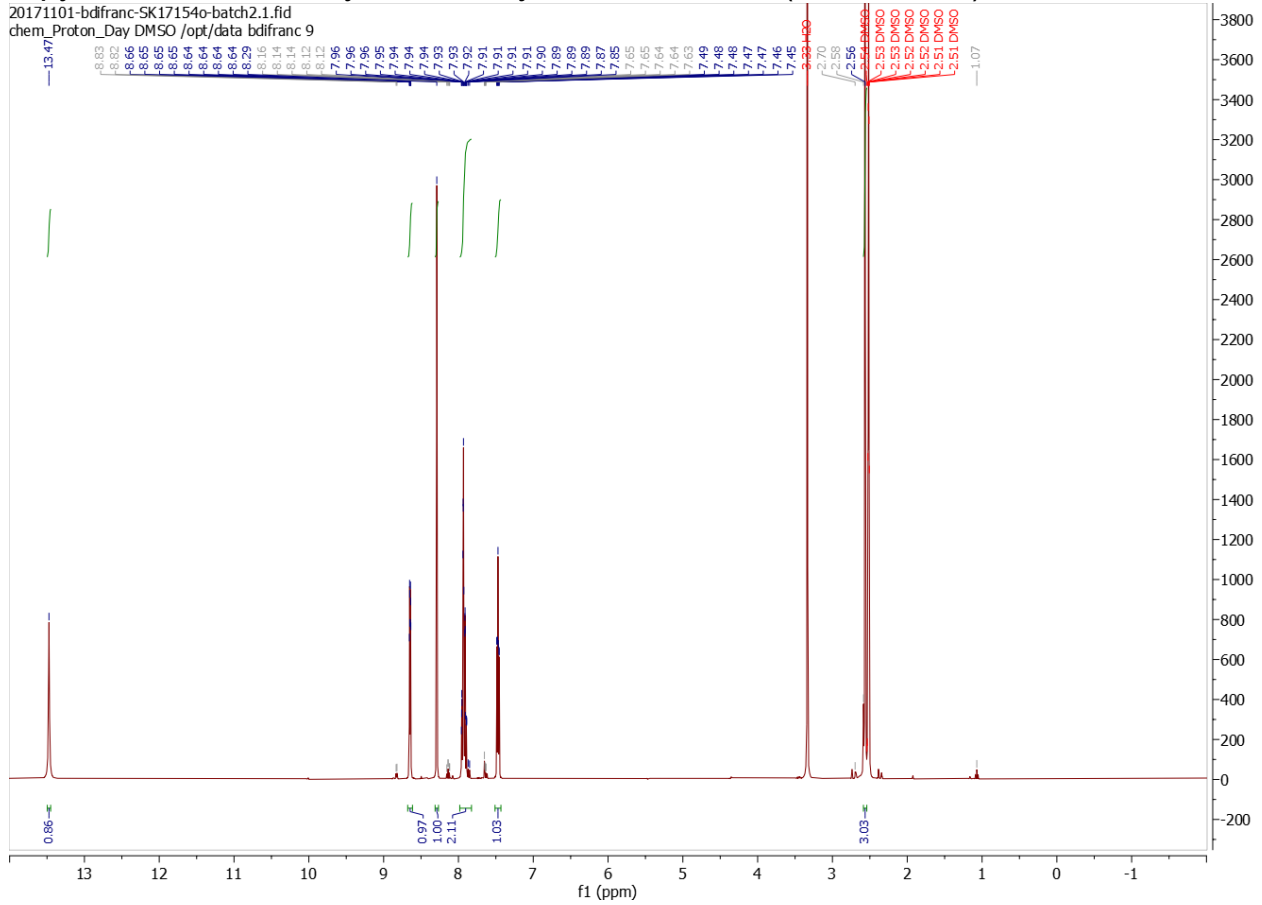

# b 2-pyridinecarboxaldehyde S-methyldithiocarbazate (SK17154-O) <sup>13</sup>C NMR

20171101-bdfranc-SK17154o-batch2.3.fid  
chem\_Carbon\_DayShort DMSO /opt/data bdfranc 9

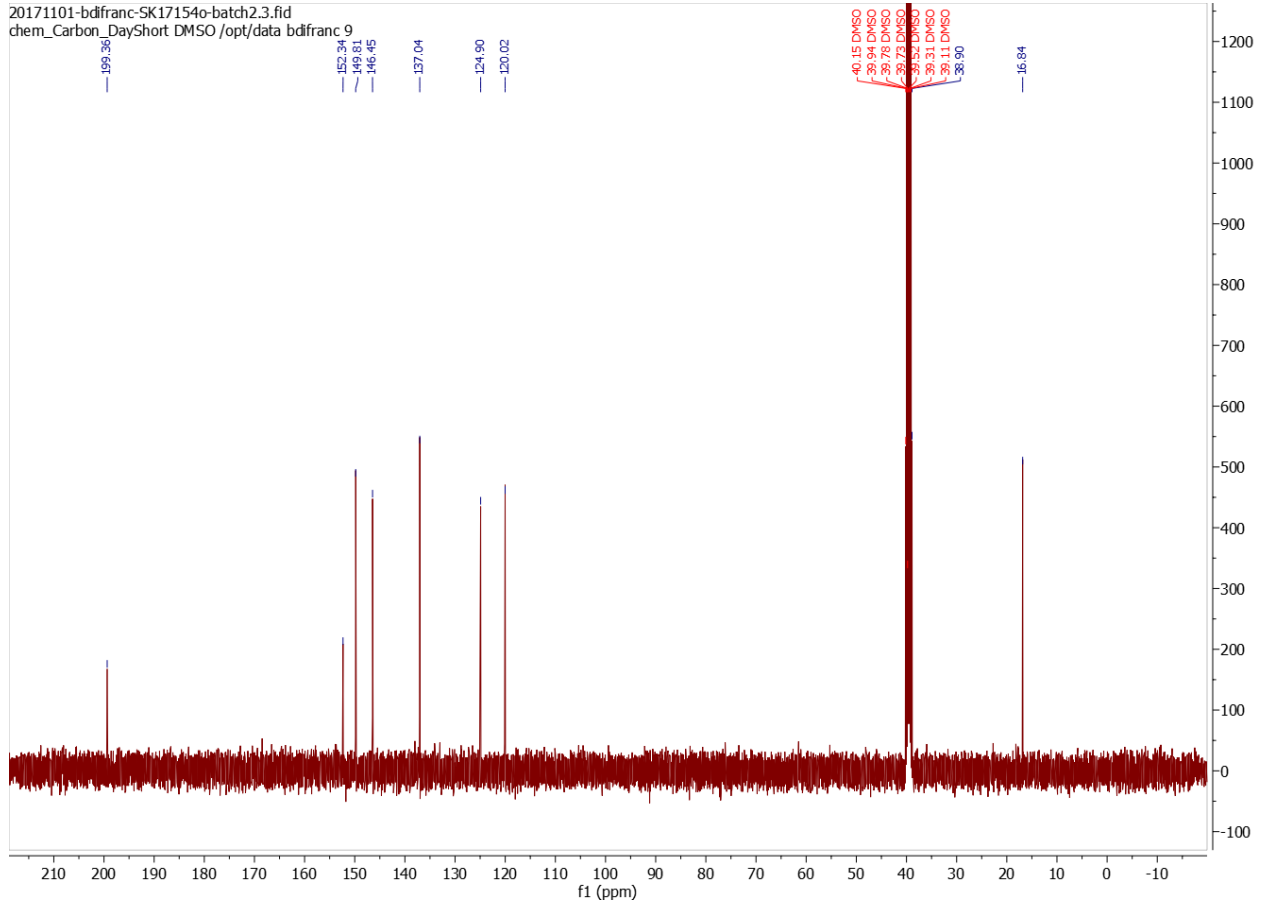

### c Benzaldehyde S-methyldithiocarbamate (1) <sup>1</sup>H NMR

20170610\_vnmrs\_500\_BD547b-SK-Ph-PROTON\_01

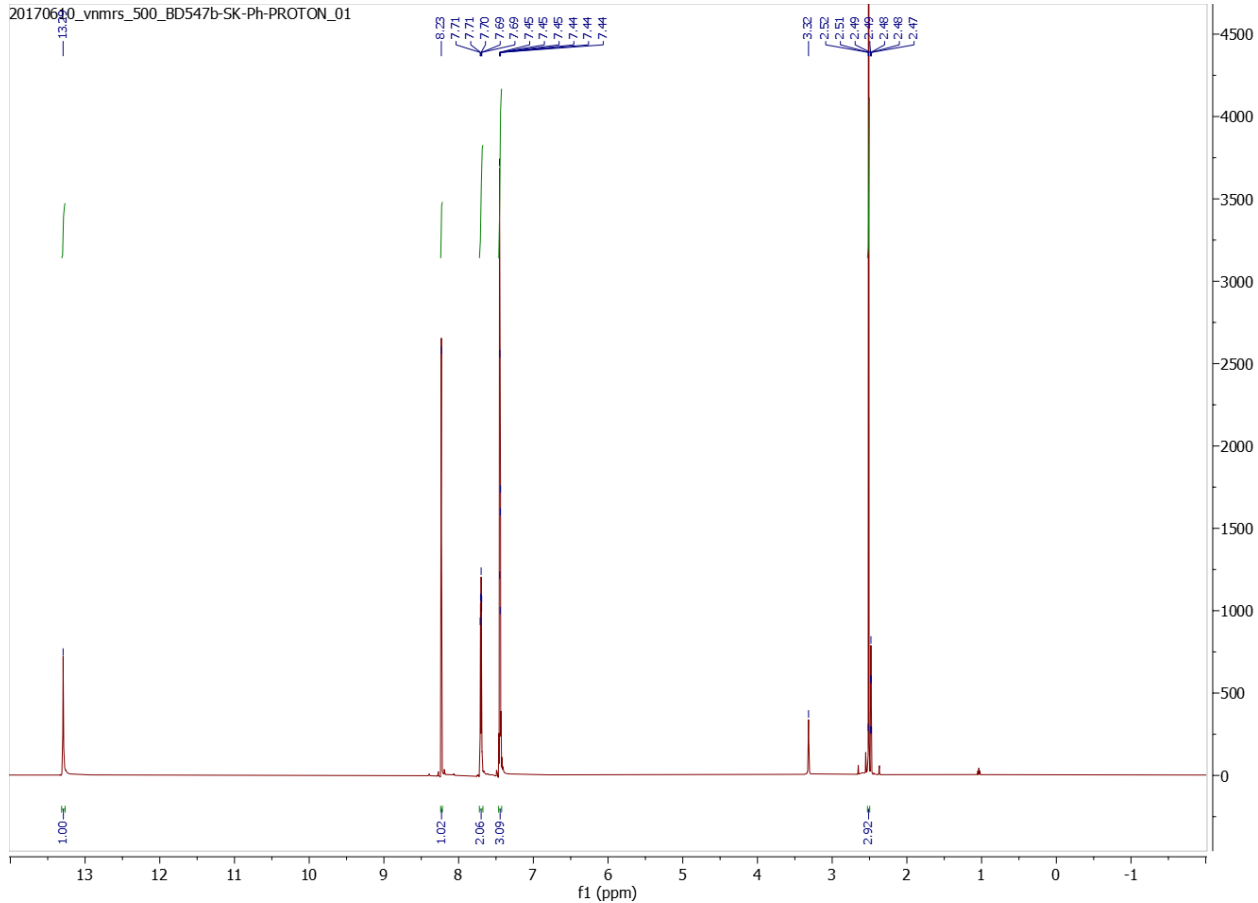

### d Benzaldehyde S-methyldithiocarbamate (1) <sup>13</sup>C NMR

20170610\_vnmrs\_500\_BD547b-SK-Ph-CARBON\_01

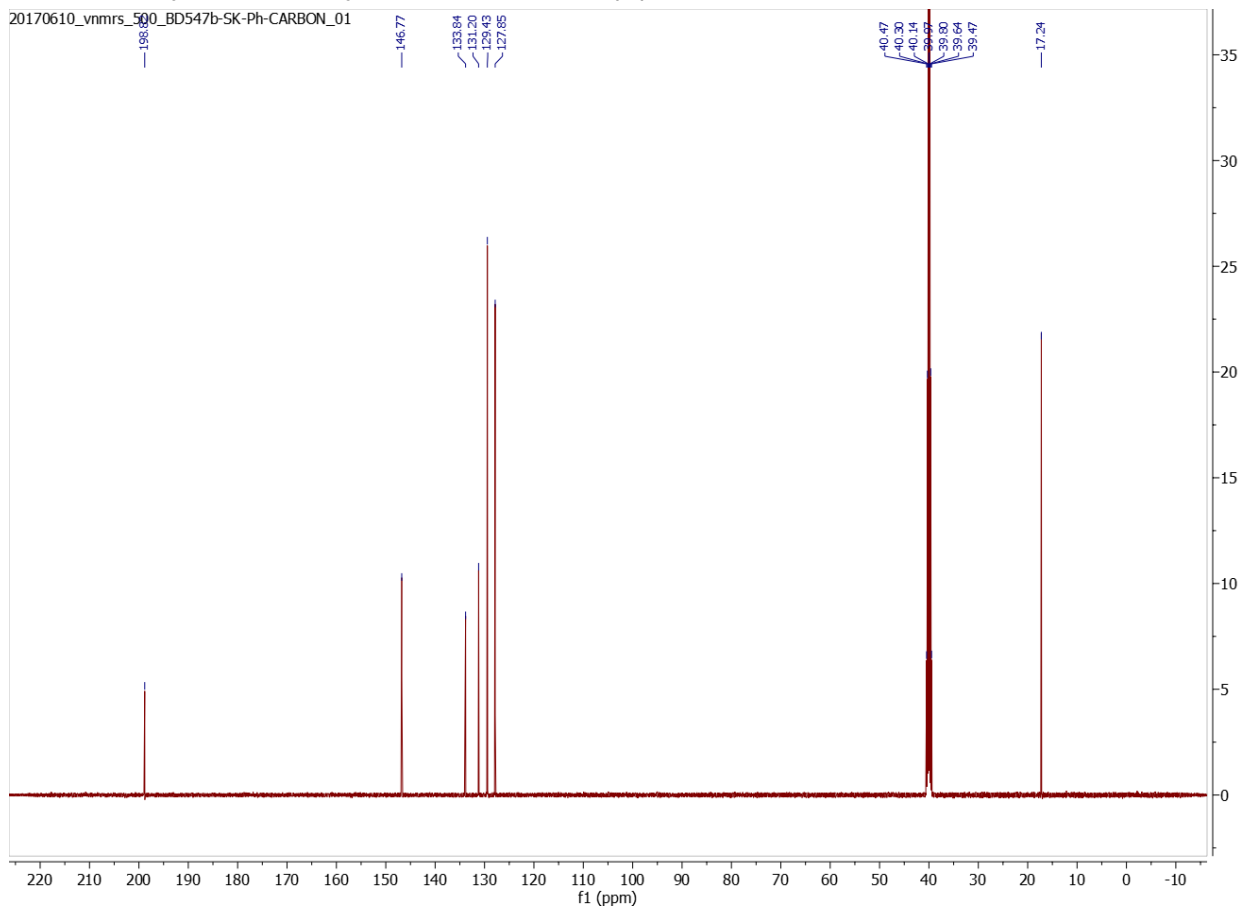

### e Benzaldehyde S-ethylthiocarbazate (9) <sup>1</sup>H NMR

20180314-bdfranc-BD561a-SK17154P-Et.1.fid  
chem\_Proton\_Day DMSO /opt/data bdfranc 21

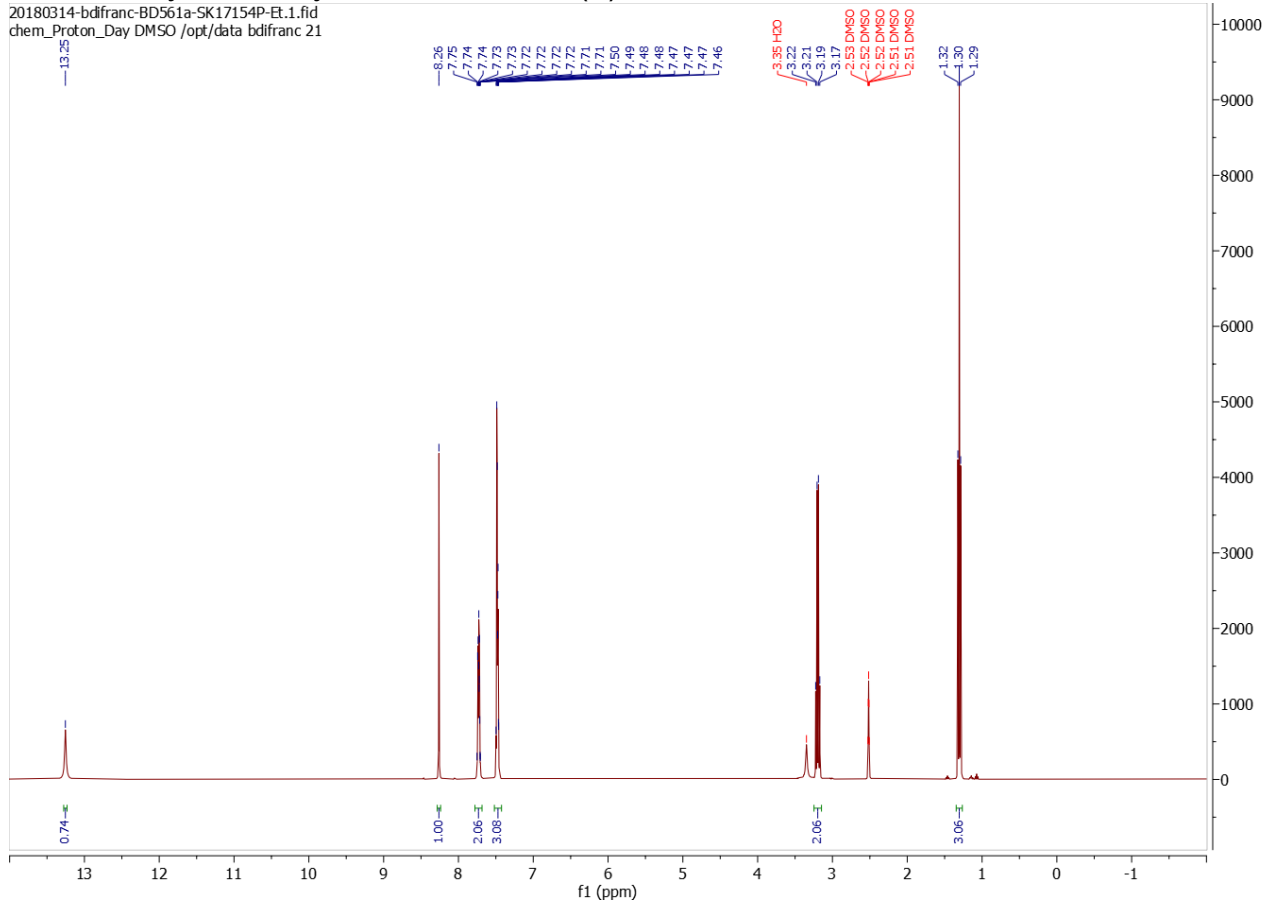

### f Benzaldehyde S-ethylthiocarbazate (9) <sup>13</sup>C NMR

20180314-bdfranc-BD561a-SK17154P-Et.2.fid  
chem\_Carbon\_DayShort DMSO /opt/data bdfranc 21

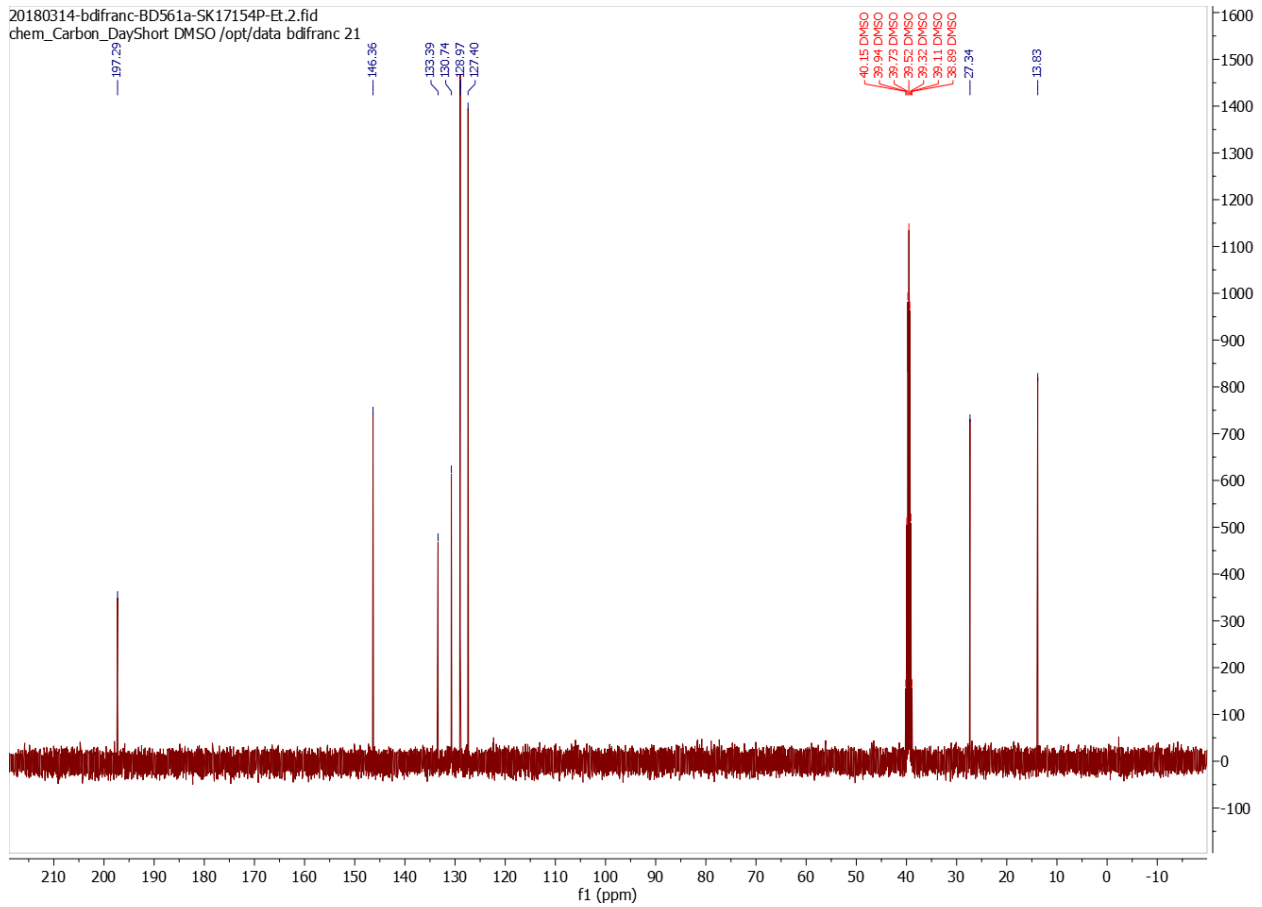

### g Benzaldehyde S-benzylthiocarbamate (10) <sup>1</sup>H NMR

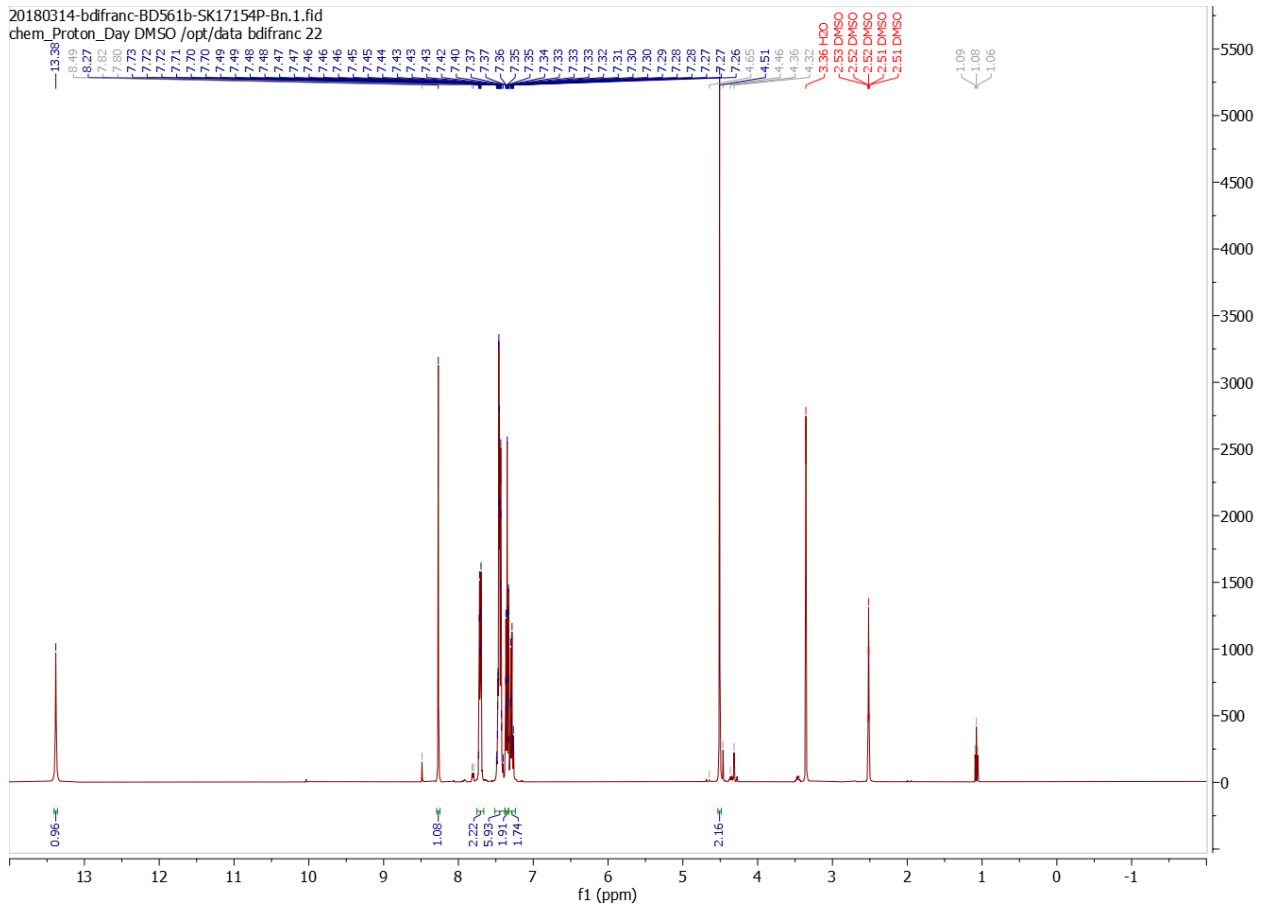

### h Benzaldehyde S-benzylthiocarbamate (10) <sup>13</sup>C NMR

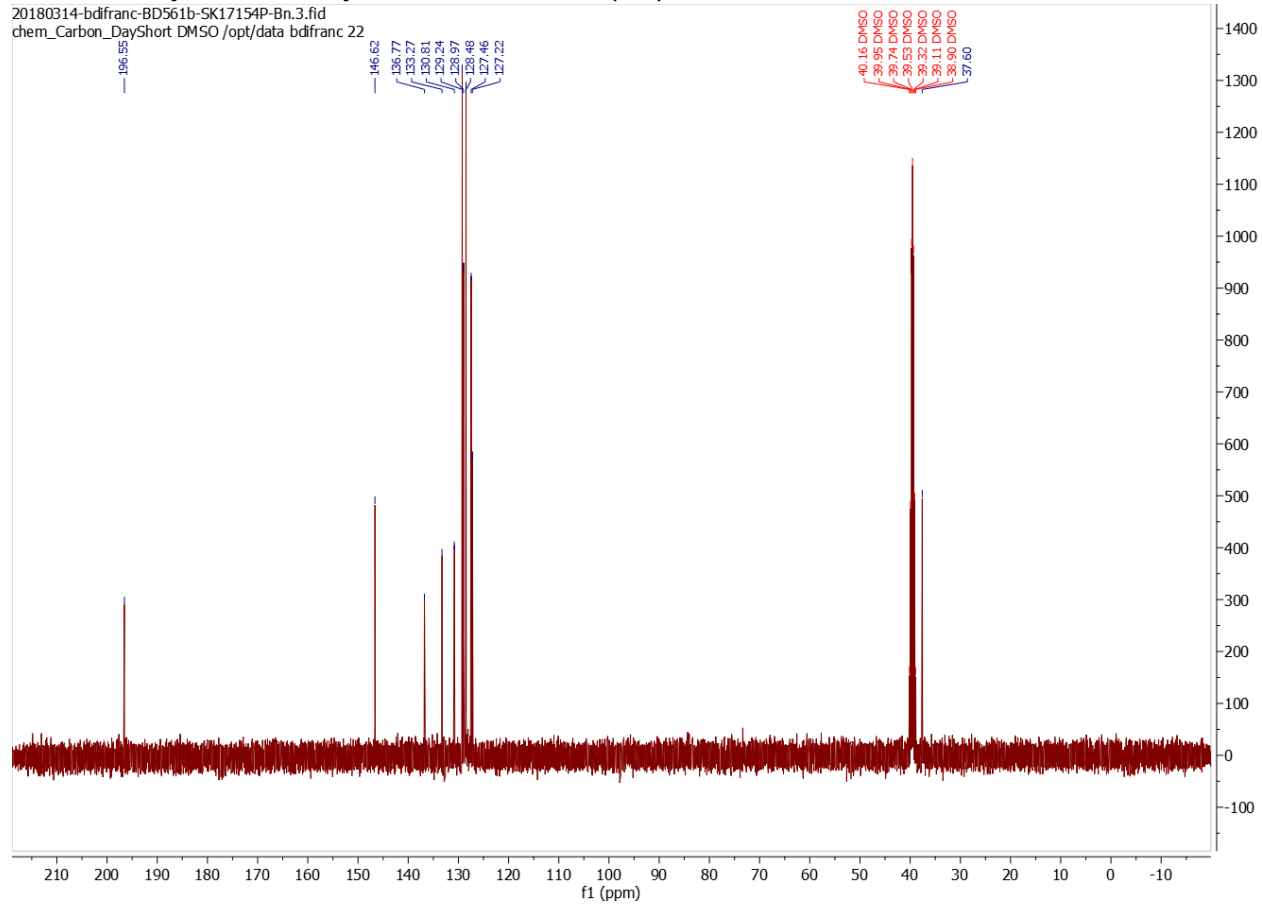



# i Benzaldehyde methylcarbazate (11) <sup>1</sup>H NMR

20180314-bdifrac-BD562-SK17154P-OMe-recryst.1.fid  
chem\_Proton\_Day DMSO /opt/data bdifrac 31

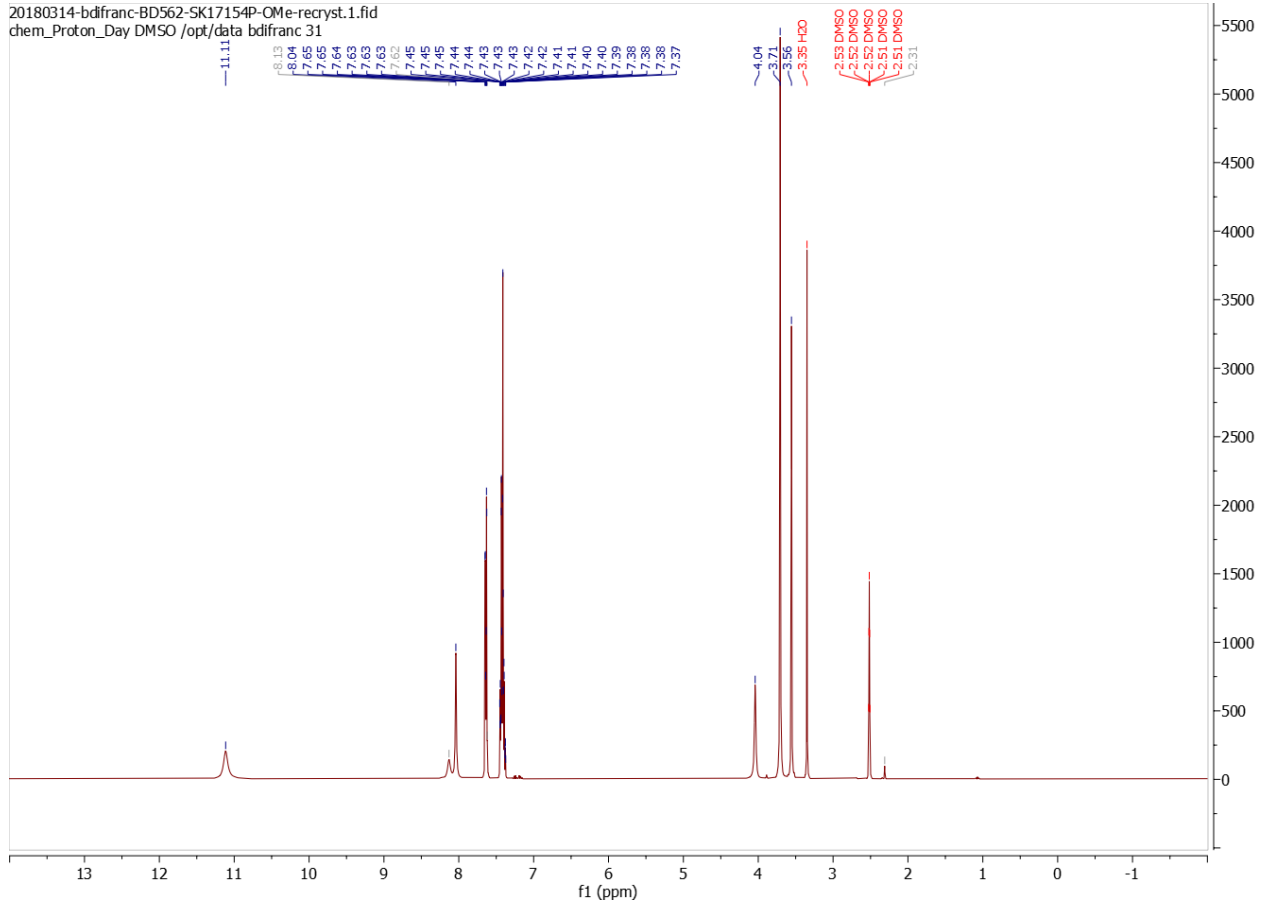

# j Benzaldehyde methylcarbazate (11) <sup>13</sup>C NMR

20180314-bdifrac-BD562-SK17154P-OMe-recryst.2.fid  
chem\_Carbon\_DayShort DMSO /opt/data bdifrac 31

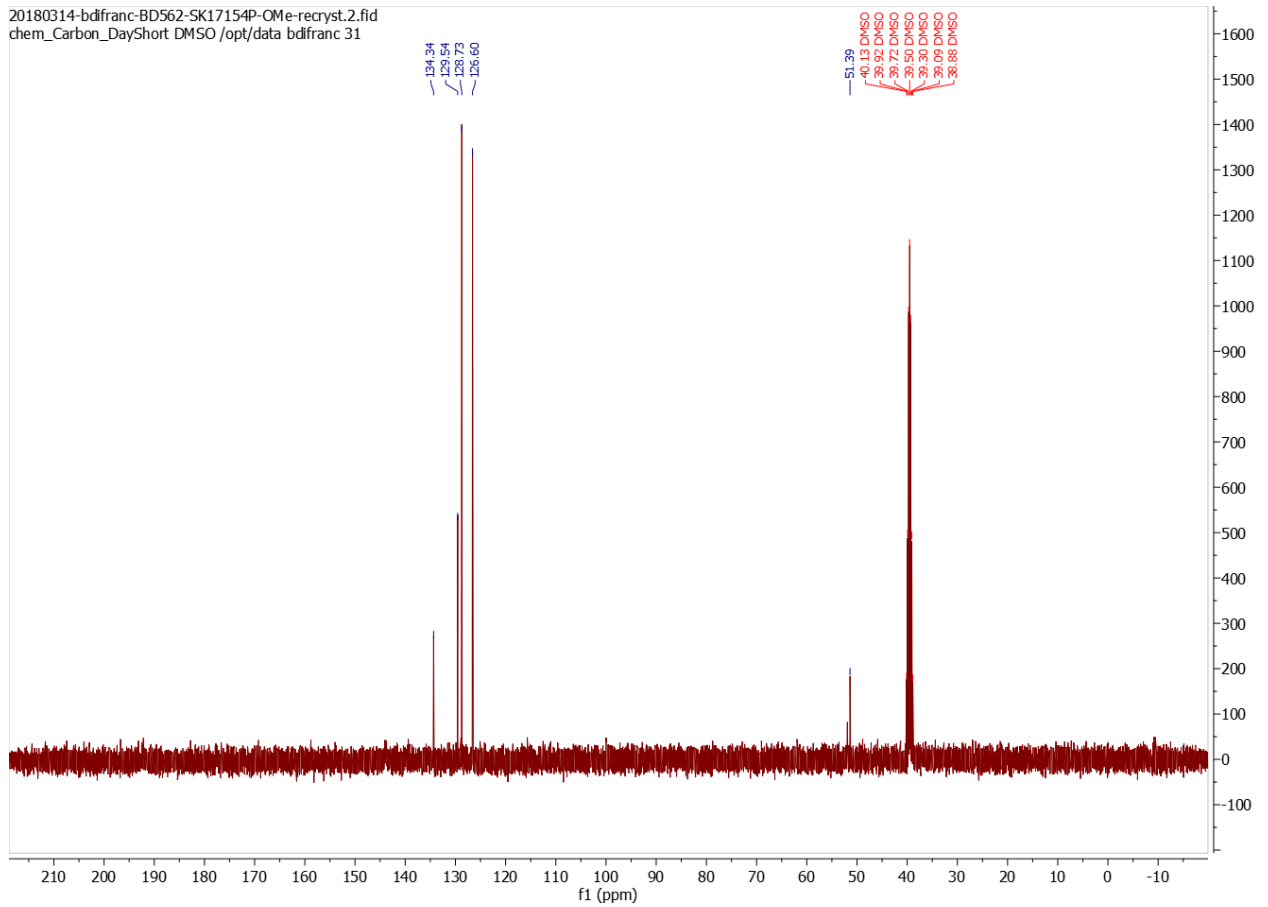

**k****Methyl 2-phenylethyl carbamodithioate (12) <sup>1</sup>H NMR**

20190328\_vnmrs\_500\_BD606-NasturlexinA-column-PROTON\_01

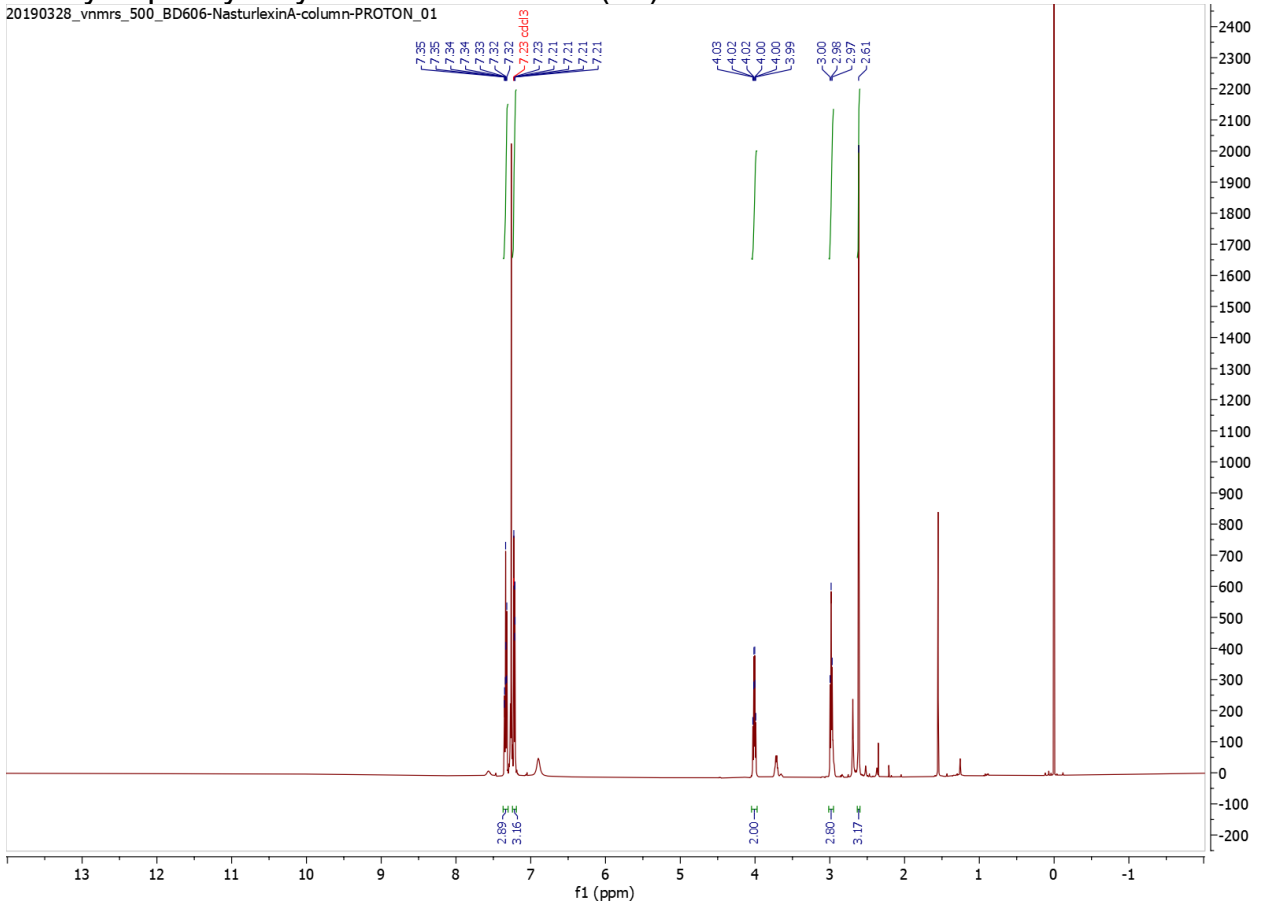**l** **Methyl 2-phenylethyl carbamodithioate (12) <sup>13</sup>C NMR**

20190328\_vnmrs\_500\_BD606-NasturlexinA-column-CARBON\_01

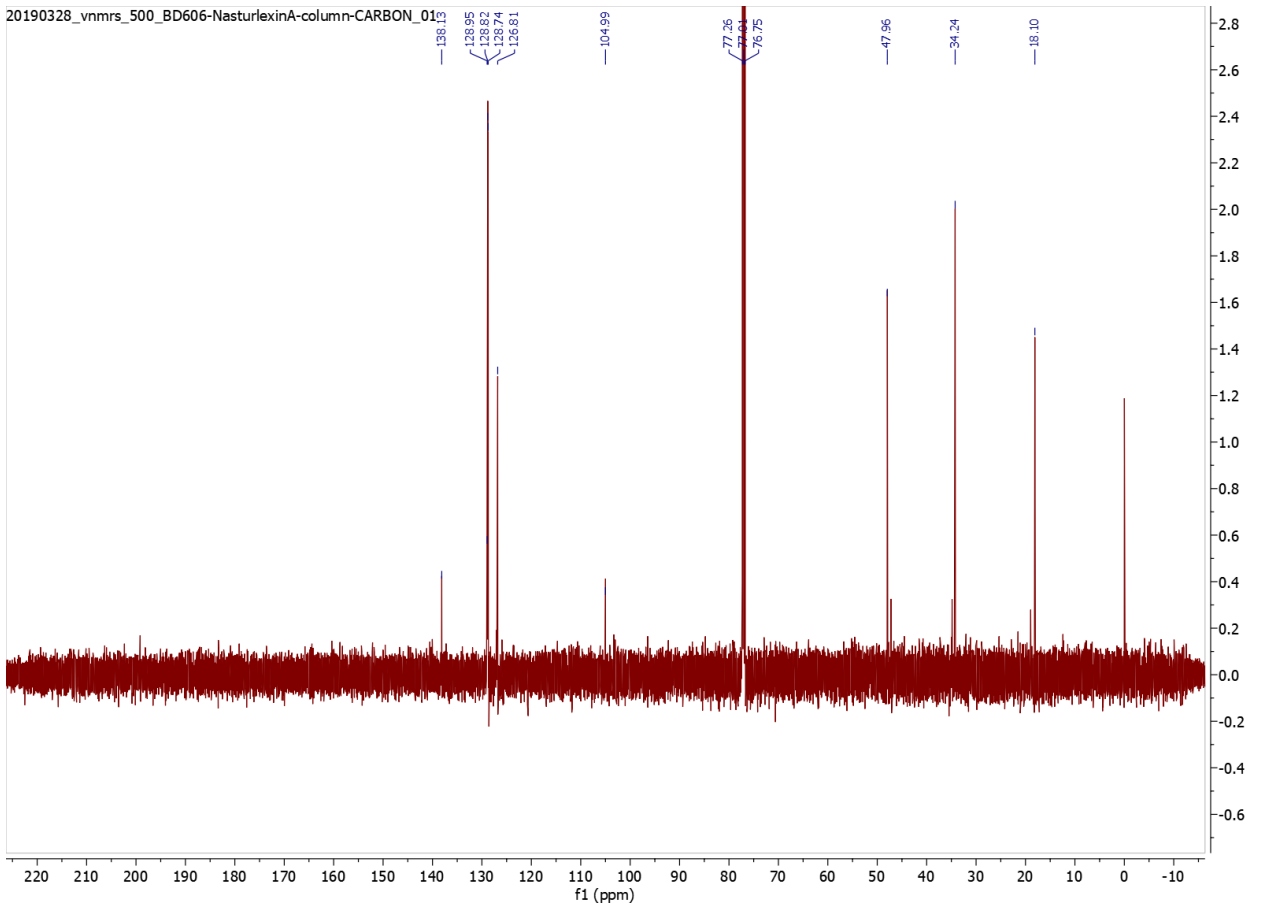

Supplement: spectrum.00296-23-s0001.pdf [file spectrum.00296-23-s0001.pdf]
